# Supplementary material
Source: Springer Nature journal article supplement (https://www.springermedizin.de/resource/supplementary/12936_2003_70_MOESM2_ESM.pdf/9546874)
Supplement: MOESM2 [file 9546874]

Type 1

690 700 710 720 730
ID K L K D F I P K I E S M I A T E K A K P A A S A P V T S G Q L L R G S S E A A T E V T T N A V T
SE D Q Q Q Q Q Q Q Q Q Q Q Q Q Q Q Q Q Q Q Q Q Q Q Q Q Q Q V V P A P A G D A Q Q V I S T Q P T S Q S A
A P G V S A T P A P T P A A A A P A P A M S K L E Y L E K L L D F L K S A Y A C H

BELEM
CM12A07
CM13N0
CM17N
CM19N
BELEM
CM12A07
CM13N0
CM17N
CM19N
BELEM
CM12A07
CM13N0
CM17N
CM19N

Type 2

690 700 710 720 730
ID K L K D F I P K I E S M I A T E K N K P T V A A A D I V A K G Q S L R G A S E T G T T G N T V N
AQ T A V V Q Q Q Q Q Q Q Q Q Q Q Q Q Q Q G G E A E T Q T N S V Q A A Q V Q Q T P A G
G A G G Q V A S T Q T I T S Q A P A P T Q A S P E P A P A P P S T P A A A V A P A P T M S K L E Y L

SAL1
CM19
CM51
CM70
IN1
IN8
IA6
IA14

Type 3

690 700 710 720 730
ID K L K D F I P K I E S M I A T E K N K P T V A A A D I V A K G Q S L R G A S E T G T T G N T V N
AQ T A V V Q Q Q Q Q Q Q Q Q Q Q Q Q Q Q G G E A E T Q T N S V Q A A Q V V P A P A G
DA QQ V I S T Q P T S Q S A P G V S A T P A P - - - - - T P A A A A A P A P A M S K L E Y L E K

SAL10
IA 10
IN 15
IN 5 0
IN 13
IN 12
CM 14
CM 17
CM 180
CM 49
BELEM
SAL10
IA 10
IN 15
IN 5 0
IN 13
IN 12
CM 14
CM 17
CM 180
CM 49
BELEM
SAL10
IA 10
IN 15
IN 5 0
IN 13
IN 12
CM 14
CM 17
CM 180
CM 49
BELEM
